# Supplementary material for: Why snakebite patients in Myanmar seek traditional healers despite availability of biomedical care at hospitals? Community perspectives on reasons
Source: PubMed Central journal article supplement (PMC5847227; doi:10.1371/journal.pntd.0006299), 2018-02-28
Supplement: pntd.0006299.s001.pdf [file pntd.0006299.s001.pdf]

Traditional Healing for Snakebite in Myanmar  
STROBE Statement —*cross-sectional studies*

|                           | <b>Item No</b> | <b>Recommendation</b>                                                                                                                                                                                                                                                                                                                      |
|---------------------------|----------------|--------------------------------------------------------------------------------------------------------------------------------------------------------------------------------------------------------------------------------------------------------------------------------------------------------------------------------------------|
| <b>Title and abstract</b> | 1              | (a) Abstract – lines 31-50<br>(b) Abstract – lines 31-50                                                                                                                                                                                                                                                                                   |
| <b>Introduction</b>       |                |                                                                                                                                                                                                                                                                                                                                            |
| Background/rationale      | 2              | Introduction - Lines 66-142                                                                                                                                                                                                                                                                                                                |
| Objectives                | 3              | Introduction - Lines 144-156                                                                                                                                                                                                                                                                                                               |
| <b>Methods</b>            |                |                                                                                                                                                                                                                                                                                                                                            |
| Study design              | 4              | Method – lines 159-174                                                                                                                                                                                                                                                                                                                     |
| Setting                   | 5              | Method - lines 176-181 & Results lines 227-231                                                                                                                                                                                                                                                                                             |
| Participants              | 6              | Methods – lines 183-193, 202-205                                                                                                                                                                                                                                                                                                           |
| Variables                 | 7              | Methods – Lines 195-200                                                                                                                                                                                                                                                                                                                    |
| Data sources/ measurement | 8*             | Methods – lines 207-219                                                                                                                                                                                                                                                                                                                    |
| Bias                      | 9              | Limitations – lines 461-476                                                                                                                                                                                                                                                                                                                |
| Study size                | 10             | Method – 178-181                                                                                                                                                                                                                                                                                                                           |
| Quantitative variables    | 11             | Not Applicable                                                                                                                                                                                                                                                                                                                             |
| Statistical methods       | 12             | (a) Describe all statistical methods, including those used to control for confounding<br>(b) Describe any methods used to examine subgroups and interactions<br>(c) Explain how missing data were addressed<br>(d) If applicable, describe analytical methods taking account of sampling strategy<br>(e) Describe any sensitivity analyses |
| Not applicable            |                |                                                                                                                                                                                                                                                                                                                                            |
| <b>Results</b>            |                |                                                                                                                                                                                                                                                                                                                                            |
| Participants              | 13*            | Methods – lines 13-189, Methods lines 202-205<br>(b) Give reasons for non-participation at each stage – Not applicable<br>(c) Consider use of a flow diagram – Not applicable                                                                                                                                                              |
| Descriptive data          | 14*            | Methods – lines 192-200, Methods lines 202-205, Results – lines 227-249<br>Methods – lines 192-200, Methods lines 202-205                                                                                                                                                                                                                  |
| Outcome data              | 15*            | Not Applicable                                                                                                                                                                                                                                                                                                                             |
| Main results              | 16             | (a) Results – lines 227-374<br>(b) Report category boundaries – Not Applicable<br>(c) Estimates of relative risk - Not Applicable                                                                                                                                                                                                          |
| Other analyses            | 17             | Not Applicable                                                                                                                                                                                                                                                                                                                             |
| <b>Discussion</b>         |                |                                                                                                                                                                                                                                                                                                                                            |
| Key results               | 18             | Discussion – lines 377-408                                                                                                                                                                                                                                                                                                                 |
| Limitations               | 19             | Limitations – lines 461-476                                                                                                                                                                                                                                                                                                                |
| Interpretation            | 20             | Discussion – lines 412-445                                                                                                                                                                                                                                                                                                                 |
| Generalisability          | 21             | Discussion – lines 412-445, Limitation – lines 461-476                                                                                                                                                                                                                                                                                     |
| <b>Other information</b>  |                |                                                                                                                                                                                                                                                                                                                                            |
| Funding                   | 22             | Funding by DFAT, Australia. Information provided online.                                                                                                                                                                                                                                                                                   |

\*Give information separately for exposed and unexposed groups.

**Note:** An Explanation and Elaboration article discusses each checklist item and gives methodological background and published examples of transparent reporting. The STROBE checklist is best used in conjunction with this article (freely available on the Web sites of PLoS Medicine at <http://www.plosmedicine.org/>, Annals of Internal Medicine at <http://www.annals.org/>, and Epidemiology at <http://www.epidem.com/>). Information on the STROBE Initiative is available at [www.strobe-statement.org](http://www.strobe-statement.org).
